# Supplementary material for: Digital Lovers and Jealousy: Anticipated Emotional Responses to Emotionally and Physically Sophisticated Sexual Technologies
Source: Hindawi journal article supplement (doi:10.1155/2024/1413351), 2024-04-20
Supplement: f1 [file 1413351.f1.pdf]

## Design properties for Vignettes

### Supplement 1a: Properties for the five levels of emotional sophistication in the vignettes for Experiment 1

| Categories                  | 1                                  | 2                                                                        | 3                                                                                                                          | 4                                                                                                                                                 | 5                                                                                                                                                                                  |
|-----------------------------|------------------------------------|--------------------------------------------------------------------------|----------------------------------------------------------------------------------------------------------------------------|---------------------------------------------------------------------------------------------------------------------------------------------------|------------------------------------------------------------------------------------------------------------------------------------------------------------------------------------|
| <b>Turing Test</b>          | Always fail                        | Takes a few minutes before failing                                       | Takes a few hours before failing                                                                                           | Takes a few days before failing                                                                                                                   | Impossible to tell                                                                                                                                                                 |
| <b>Anthrop</b>              | Never                              | Occasionally                                                             | Semi regularly                                                                                                             | Often                                                                                                                                             | People treat it like a real person, even when told it is an AI                                                                                                                     |
| <b>NLP</b>                  | Recognises only words              | Recognises hundreds of sentences accurately                              | Recognises thousands of sentences and colloquial phrases accurately                                                        | Completely understands any language except struggles with poor phrasing.                                                                          | Excellent. Seldom misunderstands even the most unusual sentence.                                                                                                                   |
| <b>NLG</b>                  | Has around 20 responses only       | Has hundreds of sentences, somewhat flexible                             | Thousands of responses, very flexible                                                                                      | Tailored response for the user yet can sound a bit rigid                                                                                          | Generates fluid and sensible responses. Initiates contextually-relevant conversation.                                                                                              |
| <b>Scope of Interaction</b> | Can do nothing but primary purpose | Has 5 activities it can play/do with you                                 | Has 25 activities it can play/do with you                                                                                  | Has 25 activities it can play/do with you but can learn up to 100                                                                                 | Can learn as many games or become apart of what ever activities the user likes to do.                                                                                              |
| <b>ML</b>                   | None                               | Very simple, remembering frequent requests                               | Average, remembering frequent likes and things user dislikes and can suggest good things.                                  | Learns a user's likes and dislikes, can recognize third parties in conversation and learn about them also.                                        | Learns a user's likes, dislikes, conversational comfort zones, pet names. Can learn and converse about 3rd parties via items disclosed in conversation.                            |
| <b>Building Intimacy</b>    | No                                 | Can aid user in simple ways.<br><br>Feels like a computer.               | Can conduct 'small talk' with the user but cannot process deeper emotional conversation. Feels like talking to a stranger. | Can converse about deep and emotional topics that are on the yours mind and attempt to give advice, however can not give any of its own opinions. | Discloses own 'thoughts', 'ideas', 'fears', limitations. Takes apparent interest in the answers when user discloses deeply personal information. Feels like a good, caring friend. |
| <b>Falling in Love</b>      | No                                 | 40% of people could imagine falling in love with their virtual assistant | 5% of people do gain romantic feelings for these robots at some point within owning them                                   | 90% of users gain strong attachments to their AI companion and 30% of people would describe their feelings as love                                | 95% of users profess feelings of love within 1 week                                                                                                                                |

Supplement 1b: Properties for the four levels of emotional sophistication x three types of technology (sex robot, sex toy, virtual reality) in the vignettes for Experiment 2

Sex Robot Scale

| Categories                    | 1                                                       | 2                                                                                          | 3                                                                                   | 4                                                   |
|-------------------------------|---------------------------------------------------------|--------------------------------------------------------------------------------------------|-------------------------------------------------------------------------------------|-----------------------------------------------------|
| <b>Life-like appearance</b>   | Not life-like at all                                    | Looks vaguely human tricking people at a distance                                          | Looks human up close but after a few minutes people can tell it's not               | Can never be told apart from a person just by sight |
| <b>Life-like sensation</b>    | Not life-like at all                                    | Feels slightly like human flesh but the texture seems poorly made                          | Feels a lot like a person but the skin does feel artificial to touch                | Feels exactly like a persons skin                   |
| <b>Robotics</b>               | Immobile                                                | Poor mobility                                                                              | Decent mobility                                                                     | Human like mobility                                 |
| <b>AI</b>                     | No ability to learn                                     | Slight learning ability                                                                    | Decent learning ability                                                             | Human-like learning ability                         |
| <b>Range of intimate acts</b> | Cannot act in a way that intentionally arouses the user | Can act to arouse a user but is very limited in what it can do and is usually unsuccessful | Can arouse user more often then not, knowing multiple ways to build sexual intimacy | Always able to arouse the user                      |
| <b>Pleasurable Sensation</b>  | Underwhelming                                           | Satisfactory                                                                               | Enjoyable                                                                           | Exhilarating                                        |

## Sex Toy Scale

| Categories                        | 1                    | 2                                                                 | 3                                                                    | 4                                          |
|-----------------------------------|----------------------|-------------------------------------------------------------------|----------------------------------------------------------------------|--------------------------------------------|
| <b>Aesthetically Pleasing</b>     | Ugly                 | Ok                                                                | Nice                                                                 | Arousing                                   |
| <b>Life-like Sensation</b>        | Not life-like at all | Feels slightly like human flesh but the texture seems poorly made | Feels a lot like a person but the skin does feel artificial to touch | Feels exactly like a person's skin         |
| <b>Robotics and Motor skills</b>  | Immobile             | Poor mobility                                                     | Decent mobility                                                      | Human-like mobility                        |
| <b>AI</b>                         | No ability to learn  | Slight learning ability                                           | Decent learning ability                                              | Human-like learning ability                |
| <b>Biometric scanning ability</b> | Can't read the user  | Can read users heartrate                                          | Can read users heartrate, temperature and breath                     | Knows exactly what the users body is doing |
| <b>Pleasurable Sensation</b>      | Underwhelming        | Satisfactory                                                      | Enjoyable                                                            | Exhilarating                               |

## Appendix 4

### Virtual Reality Sex Game Scale

| Categories                    | 1                                                       | 2                                                                                          | 3                                                                                   | 4                                                    |
|-------------------------------|---------------------------------------------------------|--------------------------------------------------------------------------------------------|-------------------------------------------------------------------------------------|------------------------------------------------------|
| <b>VR Interaction</b>         | The user has no interaction with the game               | The user can interact with 100 things in the game                                          | The user can interact with 1000 things in the game                                  | The user can interact with 10,000 things in the game |
| <b>Visual Appeal</b>          | The game looks clunky and the graphics are terrible     | The game looks ok but out dated and not polished                                           | The game looks decently polished with good graphics                                 | The game looks incredible with amazing graphics      |
| <b>Range of Intimate Acts</b> | Cannot act in a way that intentionally arouses the user | Can act to arouse a user but is very limited in what it can do and is usually unsuccessful | Can arouse user more often then not, knowing multiple ways to build sexual intimacy | Always able to arouse the user                       |
| <b>AI</b>                     | No ability to learn                                     | Slight learning ability                                                                    | Decent learning ability                                                             | Human-like learning ability                          |
| <b>Pleasurable Sensation</b>  | Underwhelming                                           | Satisfactory                                                                               | Enjoyable                                                                           | Exhilarating                                         |

## Appendix 5

### SRMV Alpha Analysis

Some items ( Participants ) were negatively correlated with the total scale and probably should be reversed.

To do this, run the function again with the 'check.keys=TRUE' option

Reliability analysis

Call: alpha(x = PSW)

| raw_alpha | std.alpha | G6(smc) | average_r | S/N | ase    | mean | sd | median_r |
|-----------|-----------|---------|-----------|-----|--------|------|----|----------|
| -0.014    | 0.56      | 0.59    | 0.2       | 1.3 | 0.0066 | 38   | 20 | 0.31     |

lower alpha upper      95% confidence boundaries  
-0.03 -0.01 0

Reliability if an item is dropped:

|              | raw_alpha | std.alpha | G6(smc) | average_r | S/N  | alpha  | se     | var.r | med.r |
|--------------|-----------|-----------|---------|-----------|------|--------|--------|-------|-------|
| Participants | 0.7154    | 0.72      | 0.67    | 0.39      | 2.57 | 0.0250 | 0.0071 | 0.38  |       |
| Q1           | -0.0107   | 0.41      | 0.45    | 0.15      | 0.69 | 0.0054 | 0.0730 | 0.18  |       |
| Q2           | -0.0043   | 0.48      | 0.50    | 0.19      | 0.93 | 0.0053 | 0.0673 | 0.23  |       |
| Q3           | -0.0190   | 0.38      | 0.43    | 0.13      | 0.62 | 0.0057 | 0.0942 | 0.13  |       |
| Q4           | -0.0120   | 0.41      | 0.45    | 0.15      | 0.69 | 0.0056 | 0.0776 | 0.18  |       |

Item statistics

|              | n   | raw.r  | std.r | r.cor | r.drop | mean  | sd   |
|--------------|-----|--------|-------|-------|--------|-------|------|
| Participants | 344 | 0.999  | 0.22  | -0.11 | -0.126 | 172.5 | 99.4 |
| Q1           | 344 | -0.072 | 0.71  | 0.63  | -0.090 | 3.4   | 1.7  |
| Q2           | 343 | -0.187 | 0.63  | 0.51  | -0.205 | 3.2   | 1.9  |
| Q3           | 344 | 0.120  | 0.74  | 0.65  | 0.106  | 4.1   | 1.5  |
| Q4           | 344 | -0.053 | 0.71  | 0.62  | -0.068 | 4.6   | 1.5  |

Non missing response frequency for each item

|    | 1    | 2    | 3    | 4    | 5    | 6    | 7    | miss |
|----|------|------|------|------|------|------|------|------|
| Q1 | 0.14 | 0.24 | 0.15 | 0.18 | 0.18 | 0.10 | 0.02 | 0    |
| Q2 | 0.24 | 0.24 | 0.08 | 0.14 | 0.14 | 0.11 | 0.04 | 0    |
| Q3 | 0.05 | 0.14 | 0.11 | 0.26 | 0.26 | 0.16 | 0.02 | 0    |
| Q4 | 0.05 | 0.08 | 0.08 | 0.18 | 0.29 | 0.25 | 0.06 | 0    |

---

## Appendix 6

### RSOI Alpha Analysis

Reliability analysis

Call: alpha(x = PRSOI)

| raw_alpha | std.alpha | G6(smc) | average_r | S/N | ase   | mean | sd | median_r |
|-----------|-----------|---------|-----------|-----|-------|------|----|----------|
| 0.061     | 0.83      | 0.88    | 0.33      | 5   | 0.016 | 21   | 10 | 0.31     |

lower alpha upper      95% confidence boundaries  
0.03 0.06 0.09

Reliability if an item is dropped:

|    | raw_alpha | std.alpha | G6(smc) | average_r | S/N | alpha | se    | var.r | med.r |
|----|-----------|-----------|---------|-----------|-----|-------|-------|-------|-------|
| X  | 0.851     | 0.85      | 0.89    | 0.39      | 5.7 | 0.012 | 0.026 | 0.35  |       |
| Q1 | 0.058     | 0.82      | 0.87    | 0.34      | 4.5 | 0.015 | 0.041 | 0.31  |       |
| Q2 | 0.054     | 0.81      | 0.85    | 0.33      | 4.4 | 0.015 | 0.034 | 0.31  |       |
| Q3 | 0.055     | 0.81      | 0.84    | 0.32      | 4.2 | 0.014 | 0.033 | 0.31  |       |
| Q4 | 0.060     | 0.82      | 0.87    | 0.34      | 4.6 | 0.015 | 0.037 | 0.32  |       |
| Q5 | 0.055     | 0.80      | 0.85    | 0.31      | 4.1 | 0.014 | 0.036 | 0.29  |       |
| Q6 | 0.051     | 0.81      | 0.86    | 0.32      | 4.2 | 0.015 | 0.039 | 0.31  |       |
| Q7 | 0.047     | 0.82      | 0.86    | 0.33      | 4.4 | 0.015 | 0.038 | 0.33  |       |
| Q8 | 0.051     | 0.81      | 0.85    | 0.33      | 4.4 | 0.015 | 0.036 | 0.32  |       |
| Q9 | 0.050     | 0.81      | 0.86    | 0.32      | 4.3 | 0.015 | 0.039 | 0.31  |       |

Item statistics

|    | n   | raw.r | std.r | r.cor | r.drop | mean  | sd   |
|----|-----|-------|-------|-------|--------|-------|------|
| X  | 344 | 0.973 | 0.30  | 0.17  | 0.140  | 172.5 | 99.4 |
| Q1 | 342 | 0.123 | 0.61  | 0.54  | 0.107  | 2.5   | 1.8  |
| Q2 | 342 | 0.177 | 0.66  | 0.65  | 0.154  | 3.1   | 2.5  |
| Q3 | 343 | 0.150 | 0.72  | 0.73  | 0.124  | 3.6   | 2.8  |
| Q4 | 344 | 0.036 | 0.58  | 0.52  | 0.037  | 6.8   | 2.5  |
| Q5 | 344 | 0.118 | 0.74  | 0.72  | 0.106  | 5.2   | 2.9  |
| Q6 | 342 | 0.219 | 0.70  | 0.66  | 0.194  | 6.2   | 2.7  |
| Q7 | 343 | 0.315 | 0.65  | 0.61  | 0.296  | 4.6   | 2.4  |
| Q8 | 343 | 0.260 | 0.66  | 0.64  | 0.242  | 3.5   | 2.1  |
| Q9 | 343 | 0.306 | 0.69  | 0.66  | 0.290  | 3.1   | 2.0  |

Non missing response frequency for each item

|    | 1    | 2    | 3    | 4    | 5    | 6    | 7    | 8    | 9    | miss |
|----|------|------|------|------|------|------|------|------|------|------|
| Q1 | 0.24 | 0.51 | 0.09 | 0.03 | 0.03 | 0.04 | 0.03 | 0.02 | 0.01 | 0.01 |
| Q2 | 0.36 | 0.25 | 0.07 | 0.08 | 0.03 | 0.08 | 0.04 | 0.05 | 0.04 | 0.01 |
| Q3 | 0.39 | 0.12 | 0.07 | 0.07 | 0.06 | 0.08 | 0.06 | 0.08 | 0.06 | 0.00 |
| Q4 | 0.07 | 0.04 | 0.03 | 0.03 | 0.10 | 0.09 | 0.13 | 0.08 | 0.43 | 0.00 |
| Q5 | 0.18 | 0.08 | 0.08 | 0.06 | 0.08 | 0.10 | 0.14 | 0.07 | 0.20 | 0.00 |
| Q6 | 0.09 | 0.06 | 0.06 | 0.05 | 0.08 | 0.09 | 0.15 | 0.16 | 0.27 | 0.01 |
| Q7 | 0.06 | 0.24 | 0.10 | 0.12 | 0.07 | 0.13 | 0.16 | 0.07 | 0.05 | 0.00 |
| Q8 | 0.13 | 0.34 | 0.09 | 0.13 | 0.10 | 0.09 | 0.07 | 0.03 | 0.02 | 0.00 |
| Q9 | 0.23 | 0.31 | 0.12 | 0.09 | 0.09 | 0.08 | 0.05 | 0.02 | 0.01 | 0.00 |

---

## Appendix 7

### Revised Sociosexual Orientation Inventory (RSOI)

Please respond honestly to the following questions:

1. With how many different partners have you had sex within the past 12 months?

|                          |                          |                          |                          |                          |                          |                          |                          |
|--------------------------|--------------------------|--------------------------|--------------------------|--------------------------|--------------------------|--------------------------|--------------------------|
| <input type="checkbox"/> |
| <input type="checkbox"/> |                          |                          |                          |                          |                          |                          |                          |
| 0                        | 1                        | 2                        | 3                        | 4                        | 5–6                      | 7–9                      | 10–19                    |
| 20 or more               |                          |                          |                          |                          |                          |                          |                          |

2. With how many different partners have you had sexual intercourse on one and only one occasion?

|                          |                          |                          |                          |                          |                          |                          |                          |
|--------------------------|--------------------------|--------------------------|--------------------------|--------------------------|--------------------------|--------------------------|--------------------------|
| <input type="checkbox"/> |
| <input type="checkbox"/> |                          |                          |                          |                          |                          |                          |                          |
| 0                        | 1                        | 2                        | 3                        | 4                        | 5–6                      | 7–9                      | 10–19                    |
| 20 or more               |                          |                          |                          |                          |                          |                          |                          |

3. With how many different partners have you had sexual intercourse without having an interest in a long-term committed relationship with this person?

|                          |                          |                          |                          |                          |                          |                          |                          |
|--------------------------|--------------------------|--------------------------|--------------------------|--------------------------|--------------------------|--------------------------|--------------------------|
| <input type="checkbox"/> |
| <input type="checkbox"/> |                          |                          |                          |                          |                          |                          |                          |
| 0                        | 1                        | 2                        | 3                        | 4                        | 5–6                      | 7–9                      | 10–19                    |
| 20 or more               |                          |                          |                          |                          |                          |                          |                          |

4. Sex without love is OK.

|                          |                          |                          |                          |                          |                          |                          |                          |
|--------------------------|--------------------------|--------------------------|--------------------------|--------------------------|--------------------------|--------------------------|--------------------------|
| <input type="checkbox"/> |
| <input type="checkbox"/> |                          |                          |                          |                          |                          |                          |                          |
| 1                        | 2                        | 3                        | 4                        | 5                        | 6                        | 7                        | 8                        |
| 9                        |                          |                          |                          |                          |                          |                          |                          |

Strongly  
Strongly

disagree  
agree

5. I can imagine myself being comfortable and enjoying “casual” sex with different partners.

|                          |                          |                          |                          |                          |                          |                          |                          |
|--------------------------|--------------------------|--------------------------|--------------------------|--------------------------|--------------------------|--------------------------|--------------------------|
| <input type="checkbox"/> |
| 1                        | 2                        | 3                        | 4                        | 5                        | 6                        | 7                        | 8                        |
| 9                        |                          |                          |                          |                          |                          |                          |                          |

Strongly  
Strongly  
disagree  
agree

6. I do not want to have sex with a person until I am sure that we will have a long-term, serious relationship.

|                          |                          |                          |                          |                          |                          |                          |                          |
|--------------------------|--------------------------|--------------------------|--------------------------|--------------------------|--------------------------|--------------------------|--------------------------|
| <input type="checkbox"/> |
| 1                        | 2                        | 3                        | 4                        | 5                        | 6                        | 7                        | 8                        |
| 9                        |                          |                          |                          |                          |                          |                          |                          |

Strongly  
Strongly  
disagree  
agree

7. How often do you have fantasies about having sex with someone with whom you do not have a committed romantic relationship?

- 1 – never
- 2 – very seldom
- 3 – about once every two or three months
- 4 – about once a month
- 5 – about once every two weeks
- 6 – about once a week
- 7 – several times per week
- 8 – nearly every day
- 9 – at least once a day

8. How often do you experience sexual arousal when you are in contact with someone with whom you do not have a committed romantic



relationship?

- 1 – never
- 2 – very seldom
- 3 – about once every two or three months
- 4 – about once a month
- 5 – about once every two weeks
- 6 – about once a week
- 7 – several times per week
- 8 – nearly every day
- 9 – at least once a day

9. In everyday life, how often do you have spontaneous fantasies about having sex with someone you have just met?

- 1 – never
- 2 – very seldom
- 3 – about once every two or three months
- 4 – about once a month
- 5 – about once every two weeks
- 6 – about once a week
- 7 – several times per week
- 8 – nearly every day
- 9 – at least once a day

## Appendix 8

### The Kinsey Scale

This scale is purely a method of self-evaluation based on your individual experience, and the rating you choose may change over time.

The scale ranges from 0, for those who would identify themselves as exclusively heterosexual with no experience with or desire for sexual activity with their same sex, to 6, for those who would identify themselves as exclusively homosexual with no experience with or desire for sexual activity with those of the opposite sex, and 1-5 for those who would identify themselves with varying levels of desire or sexual activity with either sex.

0. – Exclusively heterosexual with no homosexual
1. – Predominantly heterosexual, only incidentally homosexual
2. – Predominantly heterosexual, but more than incidentally homosexual
3. – Equally heterosexual and homosexual
4. – Predominantly homosexual, but more than incidentally heterosexual
5. – Predominantly homosexual, only incidentally heterosexual
6. – Exclusively homosexual
7. – Asexual
